# Supplementary material for: Impact of Hydrosalpinx and Surgical Timing on Ovarian Reserve and Response in in vitro fertilization or intracytoplasmic sperm injection patients: A Retrospective Cohort Study with Propensity Score Analysis
Source: Research Square preprint supplement (doi:10.21203/rs.3.rs-7817823/v1), 2025-11-05
Supplement: Supplementary file 1 [file 6948e20c08fb6e62098cd411.docx]

**Supplementary Table 1 Baseline characteristics and ovarian reserve in hydrosalpinx patients receiving different surgical treatments before COH**

| Variables | Group A (n=139) | Group B (n=139) | | | ***P***-value |
| --- | --- | --- | --- | --- | --- |
| Salpingectomy  (n=30) | Salpingostomy  (n=55) | Tubal ligation  (n=54) |
| Age (years) | 31.98±4.04 | 31.60±4.46 | 30.58±4.10 | 31.33±4.81 | 0.225 |
| BMI (kg/m2) | 24.13±3.72 | 23.41±3.27 | 23.77±2.92 | 24.20±3.99 | 0.713 |
| Duration of Infertility (years) | 4.54±3.34 | 4.47±4.64 | 3.59±2.61 | 3.76±3.23 | 0.231 |
| Infertility type, n (%) |  |  |  |  | 0.902 |
| Primary | 57(41.00) | 13(43.30) | 24(43.60) | 20(37.00) |  |
| Secondary | 82(59.00) | 17(56.70) | 31(56.40) | 34(63.00) |
| Basal FSH (IU/L) | 7.12±2.57 | 6.71±2.16 | 6.58±1.60 | 6.41±1.45 | 0.158 |
| Basal E2(pg/mL) | 36.83±14.33 | 39.65±24.22 | 33.03±13.42 | 38.05±19.75 | 0.266 |
| AMH (ng/mL) | 2.91±2.00b | 3.58±2.77 | 4.12±2.93a | 3.40±2.15 | 0.012 |
| AFC (n) | 11.88±5.02a | 14.70±6.89b | 14.64±6.19b | 14.17±5.17b | 0.002 |
| Note: BMI: body mass index; FSH: follicle stimulating hormone; E2: estradiol; AMH: Anti-Mullerian Hormone; AFC: antral follicle count. Values with different superscript letters in the same row are significantly different (***P*** < 0.05) based on post-hoc tests | | | | | |
|

We further grouped the patients according to surgical approach and found that, the baseline characteristics and ovarian reserve parameters were compared among women undergoing different surgical interventions for hydrosalpinx prior to COH. No significant differences were observed in age, BMI, duration of infertility, basal FSH, E2, or infertility type distribution between Group A and the surgical subgroups (***P*** > 0.05). However, significant differences were noted in ovarian reserve markers. AMH levels were significantly higher in the salpingostomy group compared to Group A (4.12 ± 2.93 vs 2.91 ± 2.00 ng/mL, ***P*** = 0.012). Similarly, AFC was significantly increased in all surgical subgroups compared to Group A (***P*** = 0.002).

**Supplementary Table 2 Effect of pre-COH surgical treatments for hydrosalpinx on ovarian response in COH**

| Variables | Group A (n=139) | Group B (n=139) | | | ***P***-value |
| --- | --- | --- | --- | --- | --- |
| Salpingectomy  (n=30) | Salpingostomy  (n=55) | Tubal ligation  (n=54) |
| Gn starting dose (IU) | 188.76±63.42 | 172.50±56.13 | 171.82±50.01 | 172.45±39.63 | 0.113 |
| Total Gn dose (IU) | 2154.14±1013.82 | 2031.25±1022.10 | 1857.96±806.62 | 1989.82±812.34 | 0.24 |
| Duration of ovarian stimulation (days) | 9.92±2.36 | 9.87±2.35 | 9.67±2.12 | 9.87±1.94 | 0.921 |
| hCG dosage (IU) | 7467.63±1425.96 | 7733.33±1436.79 | 7490.91±1751.96 | 7111.11±1462.32 | 0.283 |
| Endometrial thickness on hCG trigger day (cm) | 10.52±2.07 | 10.98±2.49 | 10.56±1.79 | 11.02±2.23 | 0.388 |
| No. of follicles ≥14 mm on hCG trigger day (n) | 9.84±5.35 | 9.63±5.46 | 10.95±5.77 | 11.04±4.81 | 0.349 |
| hCG day E2 (pg/mL) | 3328.50±2269.83 | 3151.70±2207.69 | 3598.36±2434.55 | 3250.13±1592.29 | 0.781 |
| No. of retrieved oocytes(n) | 9.97±6.06 | 9.97±5.49 | 11.24±6.24 | 11.33±5.04 | 0.344 |
| 2PN (n) | 6.58±4.24 | 6.37±3.85 | 7.62±4.62 | 7.72±3.78 | 0.186 |
| Fertilization rate (%) | 0.64±0.24 | 0.64±0.22 | 0.67±0.21 | 0.66±0.23 | 0.761 |
| No. of high-quality embryos(n) | 3.88±3.19 | 3.33±3.11b | 4.85±3.36a | 4.61±2.86 | 0.076 |
| No. of blastocysts (n) | 4.56±3.68 | 4.27±3.71 | 5.44±4.34 | 5.65±3.73 | 0.172 |
| Note: Gn: gonadotropin; hCG: human chorionic gonadotropin; 2 PN: two pronuclei; Values with different superscript letters in the same row are significantly different (***P*** < 0.05) based on post-hoc tests | | | | | |
|

Ovarian stimulation outcomes, including Gn dose, duration, hCG dosage, endometrial thickness, No. of follicles ≥14 mm and E2 levels were comparable across groups (***P*** > 0.05). No significant differences were observed in oocyte retrieval, fertilization rate, or blastocyst formation(***P*** > 0.05). However, the salpingostomy have higher high-quality embryo yield compared to salpingectomy.
